# Supplementary material for: A comparison between whole mung bean and decorticated mung bean: beneficial effects on the regulation of serum glucose and lipid disorders and the gut microbiota in high-fat diet and streptozotocin-induced prediabetic mice
Source: Royal Society of Chemistry journal article supplement (doi:10.1039/d0fo00379d), 2020-01-01
Supplement: d0fo00379d1.pdf [file d0fo00379d1.pdf]

**Table S1** Proximate nutritional composition of whole mung bean (WMB) and decorticated mung bean (DMB)

|     | Carbohydrate   | Protein        | Fat           | Ash           | Fiber         | Sucrose       | TPC (GAE/g)   |
|-----|----------------|----------------|---------------|---------------|---------------|---------------|---------------|
| WMB | 64.78 ± 0.36 a | 25.81 ± 0.12 b | 2.58 ± 0.02 a | 3.36 ± 0.04 a | 3.48 ± 0.01 a | 0.89 ± 0.02 b | 2.96 ± 0.02 a |
| DMB | 66.28 ± 0.28 a | 27.32 ± 0.08 a | 2.56 ± 0.01 a | 2.99 ± 0.05 b | 0.85 ± 0.03 b | 1.17 ± 0.05 a | 0.38 ± 0.04 b |

Data are expressed as mean ± standard deviation ( $n = 3$ ). Means with different small letter superscripts in the same column are significantly different at  $P < 0.05$ . The letter “a” denotes the highest value. TPC, Total Phenolics content; GAE, Gallic acid equivalents. Determination of TPC followed a previous study by Xu et al <sup>1</sup>.

**Table S2** Composition of experimental diets<sup>1</sup>, and energy and their source of different groups

| Ingredient (g/kg)                                    | NC (Normal chow diet) | DC (High-fat diet) | Mung bean-based diet |        |
|------------------------------------------------------|-----------------------|--------------------|----------------------|--------|
|                                                      |                       |                    | WMB                  | DMB    |
| Mung bean                                            | 0.00                  | 0.00               | 300.00               | 300    |
| Casein, 80 Mesh                                      | 189.56                | 258.45             | 181.02               | 176.49 |
| L-Cystine                                            | 2.84                  | 3.88               | 3.88                 | 3.88   |
| Corn Starch                                          | 479.79                | 0.00               | 0.00                 | 0.00   |
| Maltodextrin 10                                      | 118.48                | 161.53             | 0.00                 | 0.00   |
| Sucrose                                              | 65.21                 | 88.91              | 46.05                | 41.54  |
| Cellulose, BW200                                     | 47.39                 | 64.61              | 54.17                | 60.06  |
| Soybean Oil                                          | 23.70                 | 32.31              | 24.57                | 28.01  |
| Lard                                                 | 18.96                 | 316.60             | 316.60               | 316.60 |
| Mineral Mix                                          | 9.48                  | 12.92              | 12.92                | 12.92  |
| DiCalcium Phosphate                                  | 12.32                 | 16.80              | 16.80                | 16.80  |
| Calcium Carbonate                                    | 5.21                  | 7.11               | 7.11                 | 7.11   |
| Potassium Citrate, 1 H <sub>2</sub> O                | 15.64                 | 21.32              | 21.32                | 21.32  |
| Vitamin Mix, V10001                                  | 9.48                  | 12.92              | 12.92                | 12.92  |
| Choline Bitartrate                                   | 1.90                  | 2.58               | 2.58                 | 2.58   |
| FD&C Yellow Dye #5                                   | 0.04                  | 0.00               | 0.00                 | 0.00   |
| FD&C Blue Dye #1                                     | 0.01                  | 0.07               | 0.07                 | 0.07   |
| Total (g)                                            | 1000                  | 1000               | 1000                 | 1000   |
| % Energy and their source (physiological fuel value) |                       |                    |                      |        |
| Protein                                              | 20                    | 20                 | 20                   | 20     |
| Carbohydrate                                         | 70                    | 20                 | 20                   | 20     |
| Fat                                                  | 10                    | 60                 | 60                   | 60     |
| Total                                                | 100                   | 100                | 100                  | 100    |

WMB, High-fat diet supplemented with whole mung bean; DMB, High-fat diet supplemented with decorticated mung bean.

<sup>1</sup> To equalize the carbohydrate, protein, fat, sucrose and fiber content (g/kg diet) of the high-fat diet and mung bean-based diet, the maltodextrin, casein, soybean oil, sucrose, and cellulose were reduced in the WMB and DMB diets, respectively.

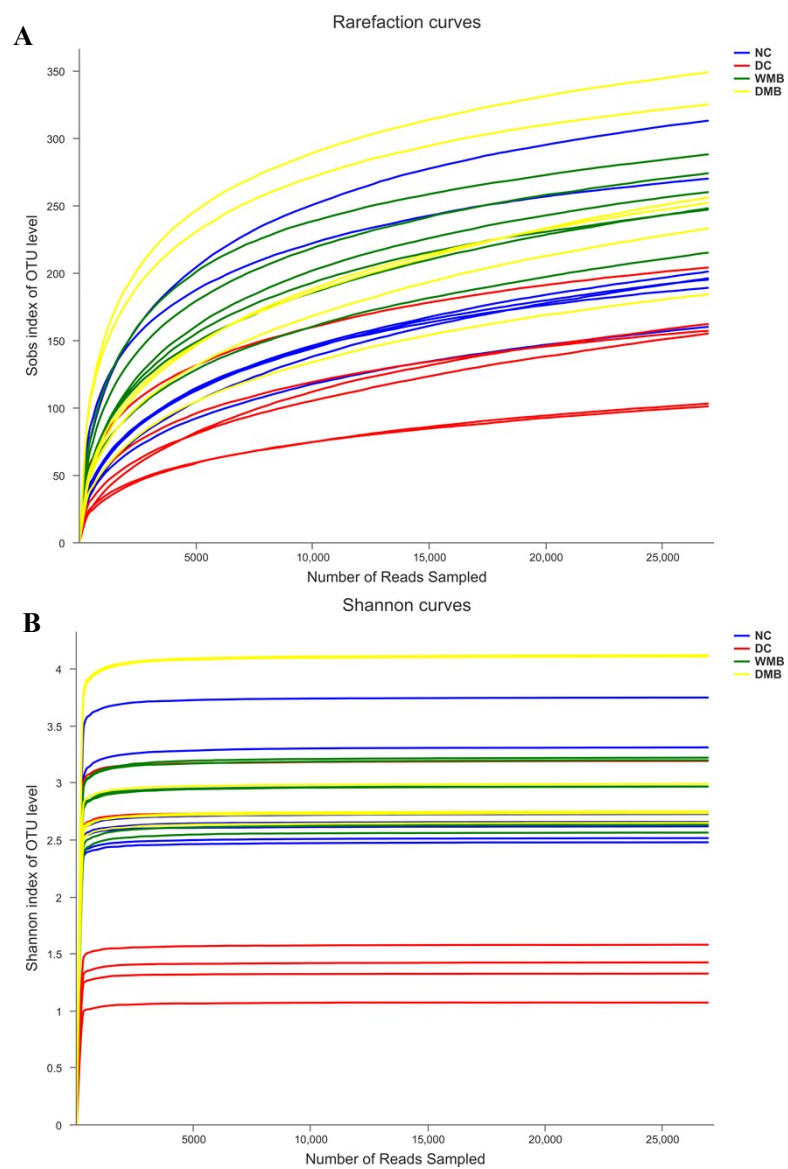

**Fig. S1** Alpha diversity analysis of samples by Rarefaction analysis (A) and Shannon index (B). Each bar represents one sample (n = 6).

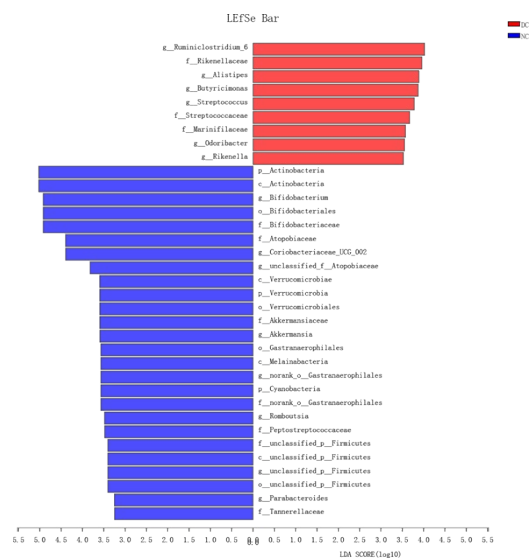

**Fig. S2** Linear discriminant analysis (LDA) scores derived from LEfSe analysis (NC vs DC groups, LDA score of > 3. The higher the score is, the more important the role is).

## References

1. B. J. Xu and S. K. C. Chang, A Comparative Study on Phenolic Profiles and Antioxidant Activities of Legumes as Affected by Extraction Solvents, J. Food Sci., 2007, **72**, S159-S166.
